# Supplementary material
Source: Research Square preprint supplement (doi:10.21203/rs.3.rs-9569811/v1)
Supplement: Supplementary file 1 [file 0687c913b9bbcd9845c51727.pdf]

# Title : Sickle cell disease and severity of anemia in a low-resource city: assessing functional capacity by six-minute walk test

## Graphical Abstract

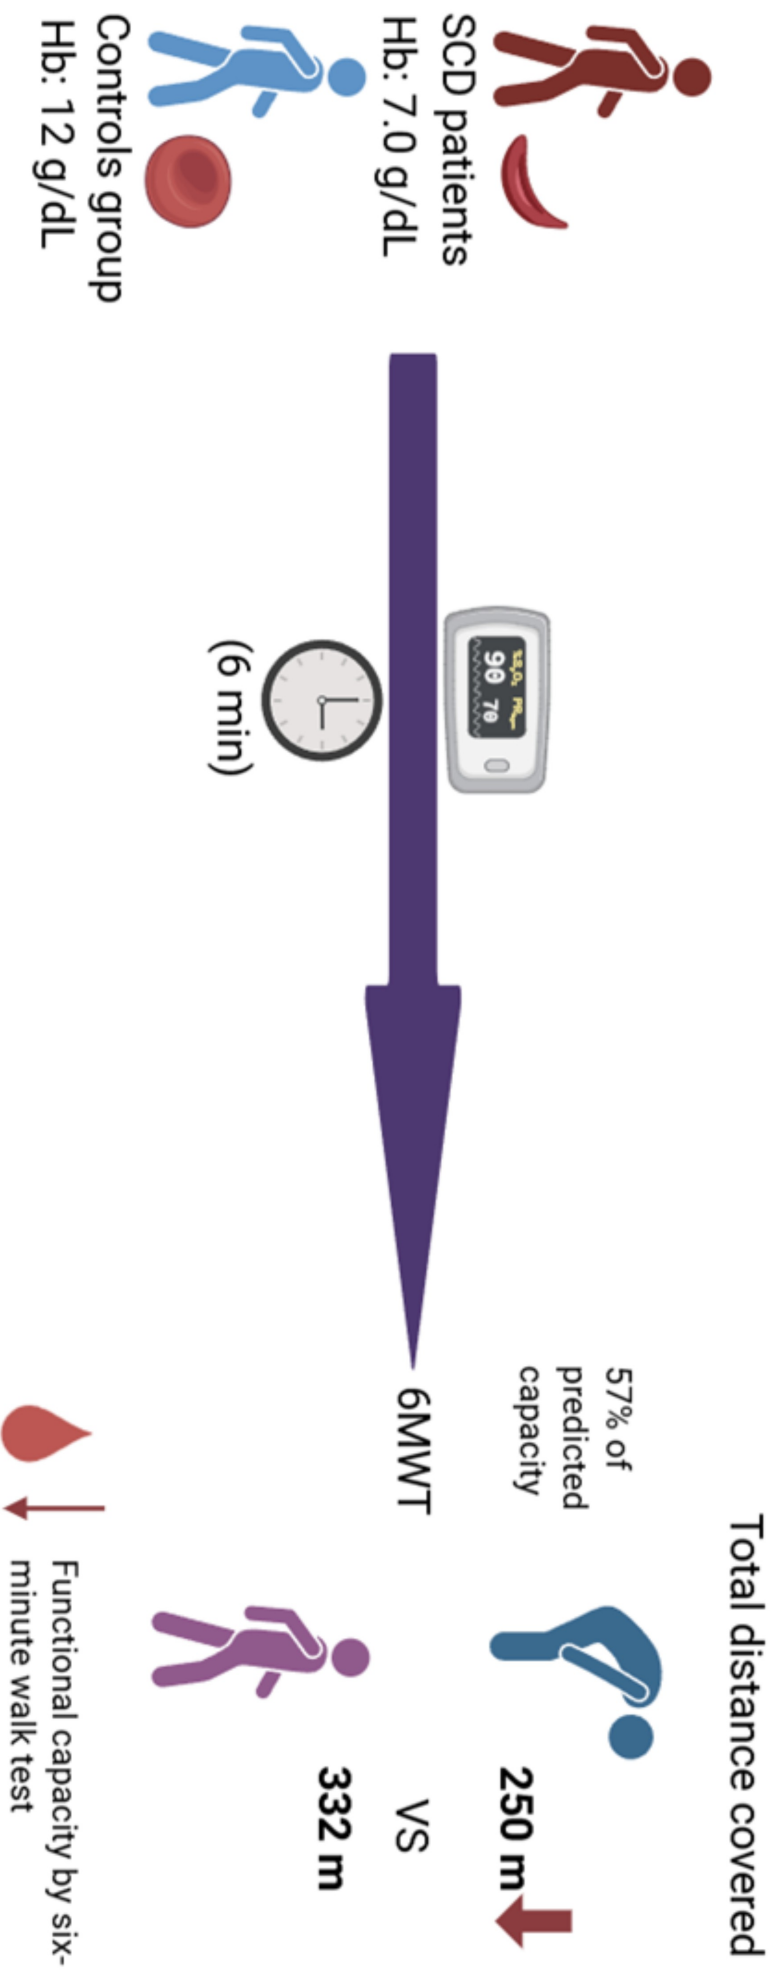

### Conclusions :

SCD severely impairs functional capacity, independently of growth retardation. Anemia emerges as the primary factor limiting physical performance, highlighting the importance of its management in improving patient autonomy. In low-resource settings, 6MWT provides a robust and accessible clinical tool for assessing disease severity.

SCD: Sickle cell disease, 6MWT: Six-minute walk test
